# Supplementary material for: Autophagy protein ATG16L1 prevents necroptosis in the intestinal epithelium
Source: PubMed Central journal article supplement — J Exp Med. 2017 Dec 4;214(12):3687–705. doi: 10.1084/jem.20170558 (PMC5716041; doi:10.1084/jem.20170558), 2017-12-04
Supplement: JEM_20170558_sm.pdf [file JEM_20170558_sm.pdf]

SUPPLEMENTAL MATERIAL

Matsuzawa-Ishimoto et al., <https://doi.org/10.1084/jem.20170558>

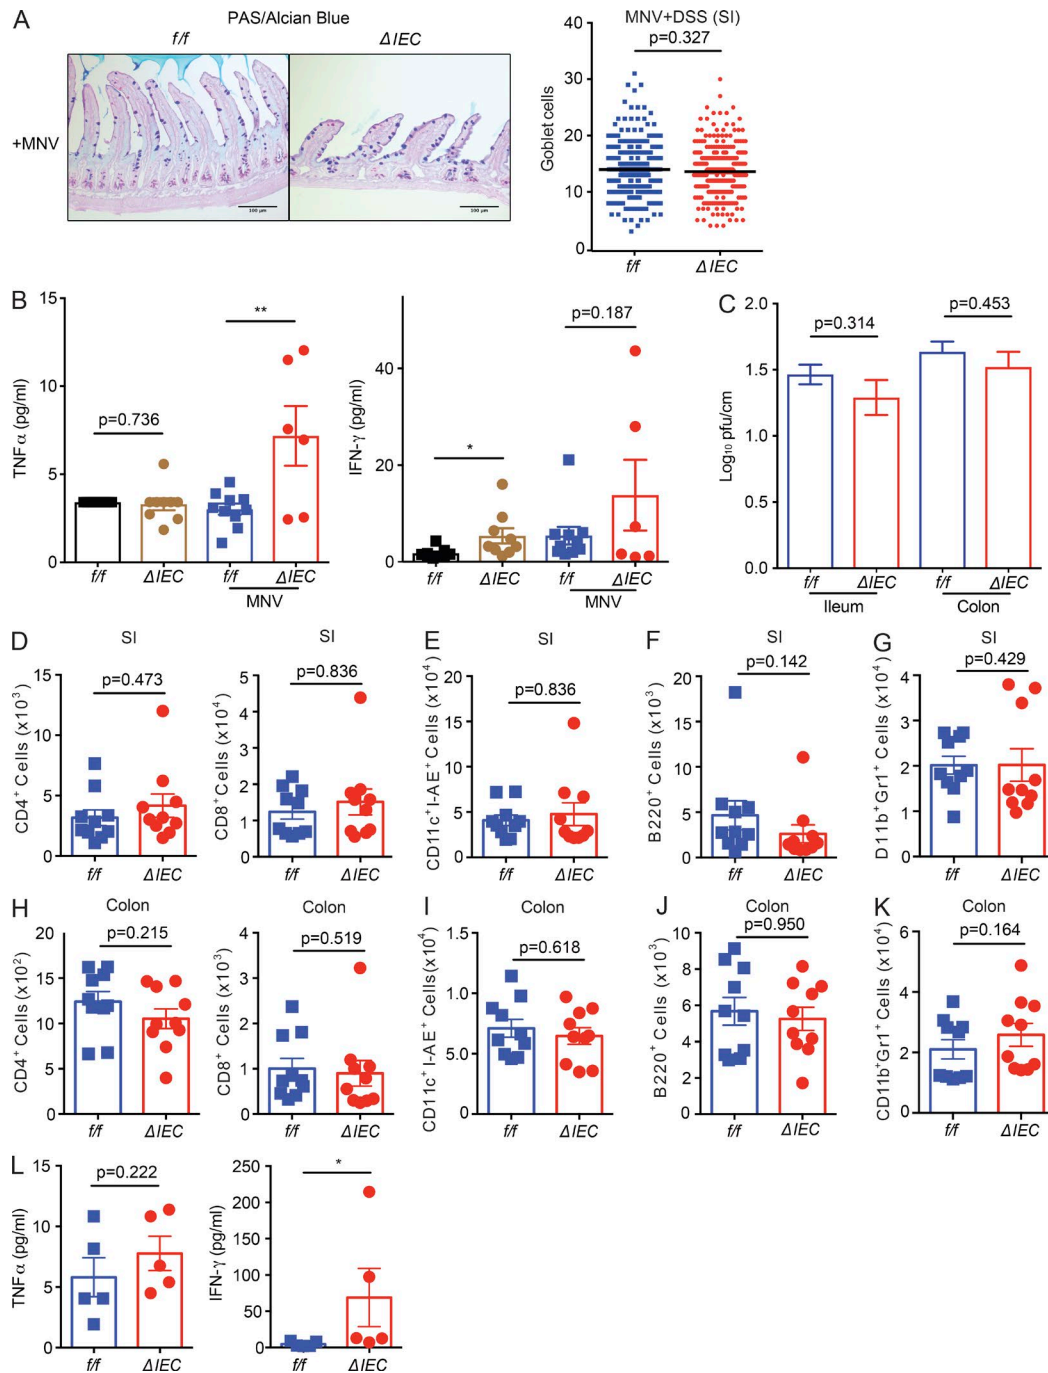

Figure S1. **Additional characterization of mice deficient in ATG16L1 in the epithelium after MNV+DSS and allo-HSCT treatment.** (A) Representative images of periodic acid-Schiff (PAS)/Alcian blue staining and quantification of goblet cells in the small intestinal samples harvested from MNV-infected *Atg16L1<sup>f/f</sup>* and *Atg16L1 $\Delta IEC$*  mice on day 15 after infection. At least 50 villi were quantified from three mice per group. Bars, 100  $\mu$ m. (B) Quantification of TNF $\alpha$  and IFN- $\gamma$  in sera harvested from mice on day 15 after infection. *n* = 9 (*f/f*), 9 ( $\Delta IEC$ ), 10 (*f/f* + MNV), and 6 ( $\Delta IEC$  + MNV). (C) PFUs of MNV in ileum and colon harvested from *Atg16L1<sup>f/f</sup>* (*f/f*) and *Atg16L1 $\Delta IEC$*  ( $\Delta IEC$ ) mice on day 10 after infection. *n* = 3 per group. (D–K) Flow cytometric analysis of CD4<sup>+</sup> and CD8<sup>+</sup> T cells (D), CD11c<sup>+</sup>I-AE<sup>+</sup> cells (E), B220<sup>+</sup> cells (F), and CD11b<sup>+</sup> cells (G) in the lamina propria of the small intestine and CD4<sup>+</sup> and CD8<sup>+</sup> T cells (H), CD11c<sup>+</sup>I-AE<sup>+</sup> cells (I), B220<sup>+</sup> cells (J), and CD11b<sup>+</sup> cells (K) in the lamina propria of the colon on day 4 after transplantation. *n* = 9 (*f/f*) and 10 ( $\Delta IEC$ ). Bars represent mean  $\pm$  SEM, and data points represent individual mice. (L) Quantification of TNF $\alpha$  and IFN- $\gamma$  in sera harvested from mice on day 4 after transplantation. *n* = 5 per group. Data points in A represent individual villi, individual mice in B and D–L, and data points in C are mean of three technical replicates. Bars represent mean  $\pm$  SEM, and at least two independent experiments were performed. \*, *P* < 0.05; \*\*, *P* < 0.01 by unpaired *t* test in A, one-way ANOVA and Tukey's test in B and C, and Mann-Whitney *U* test in D–L.

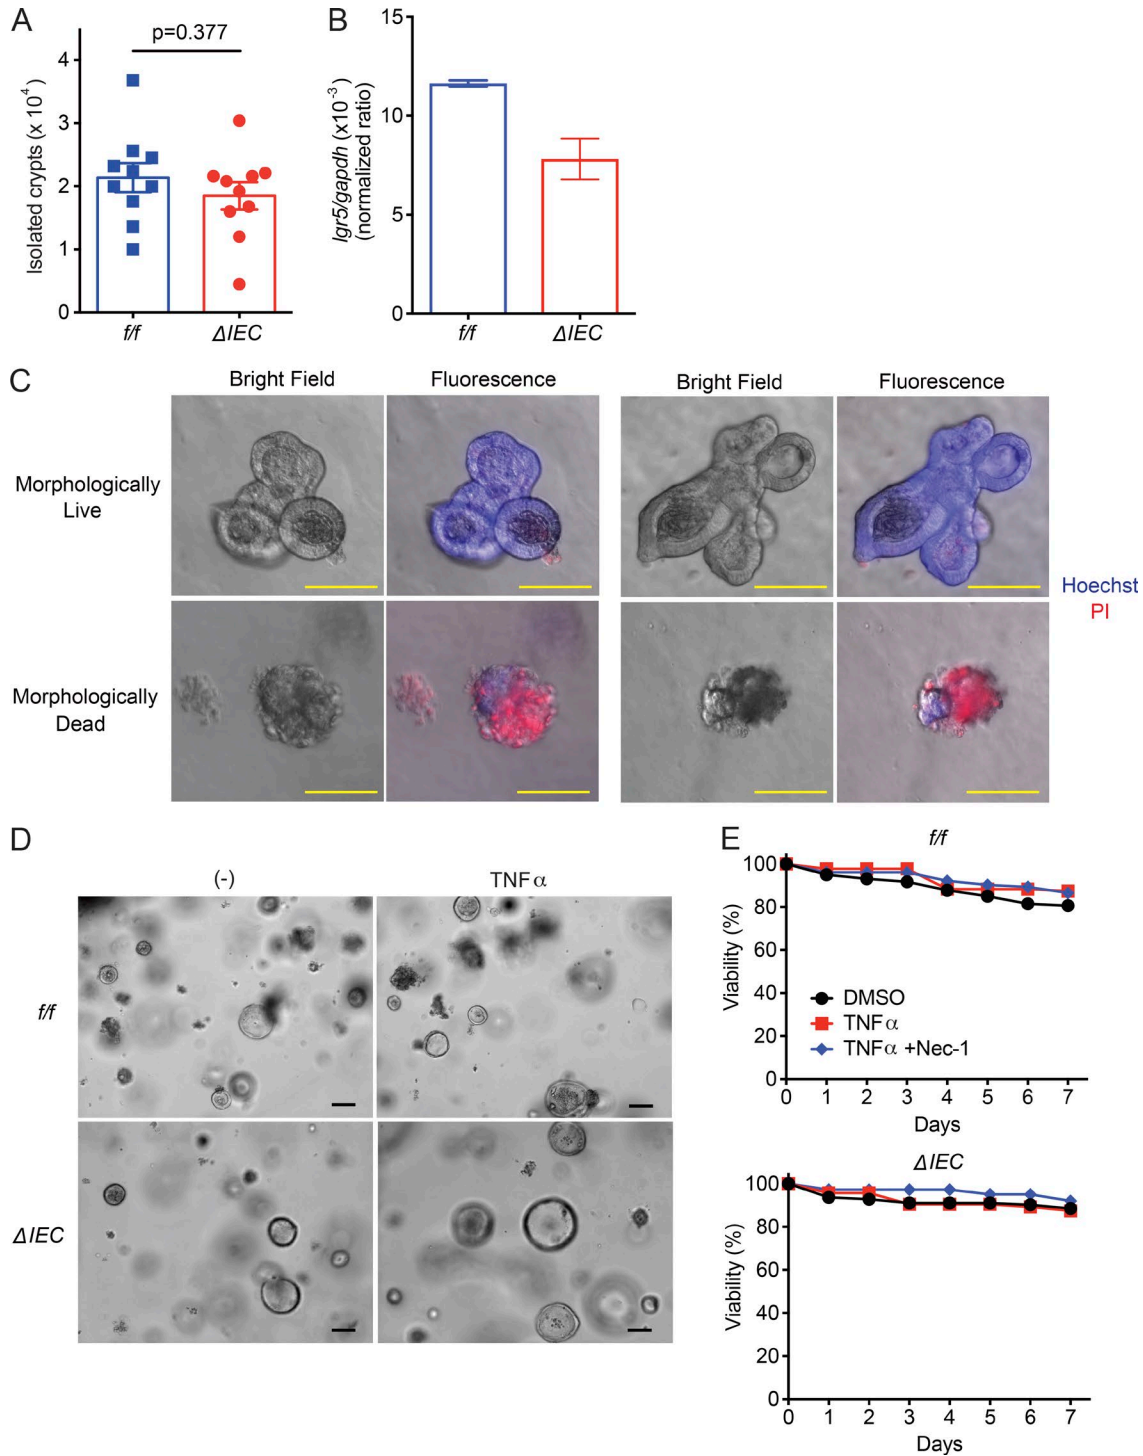

Figure S2. **Effect of ATG16L1 deletion on small intestinal stem cells and colonic organoids.** (A) Number of crypts isolated from each genotype.  $n = 10$  per group. (B) Quantitative RT-PCR measurement of *Lgr5* expression normalized to *Gapdh* in *Atg16L1<sup>f/f</sup>* (*f/f*) and *Atg16L1 $\Delta IEC$*  ( $\Delta IEC$ ) organoids on day 3.  $n = 3$  per group. (C) Number of viable organoids was quantified in several figures on the basis of appearance. Organoids displaying visible lumens were considered alive (representative pictures in top row), whereas organoids displaying a collapsed structure with an absence of buds or lumen, such as those in the bottom row, were considered dead. Loss of viability on the basis of these morphological criteria was confirmed by staining the organoids with PI (red) and Hoechst 33342 (blue) where uptake of PI indicated the presence of dead cells. (D and E) Representative images (D) and quantification of viability (E) of colonic organoids on day 3  $\pm$  TNF $\alpha$  and Nec-1.  $n = 3$  mice each. (C and D) Bars: 50  $\mu$ m (C); 100  $\mu$ m (D). Data points in A represent individual mice, and data points in B and E are mean of three technical replicates. Bars represent  $\pm$ SEM, and at least two independent experiments were performed.

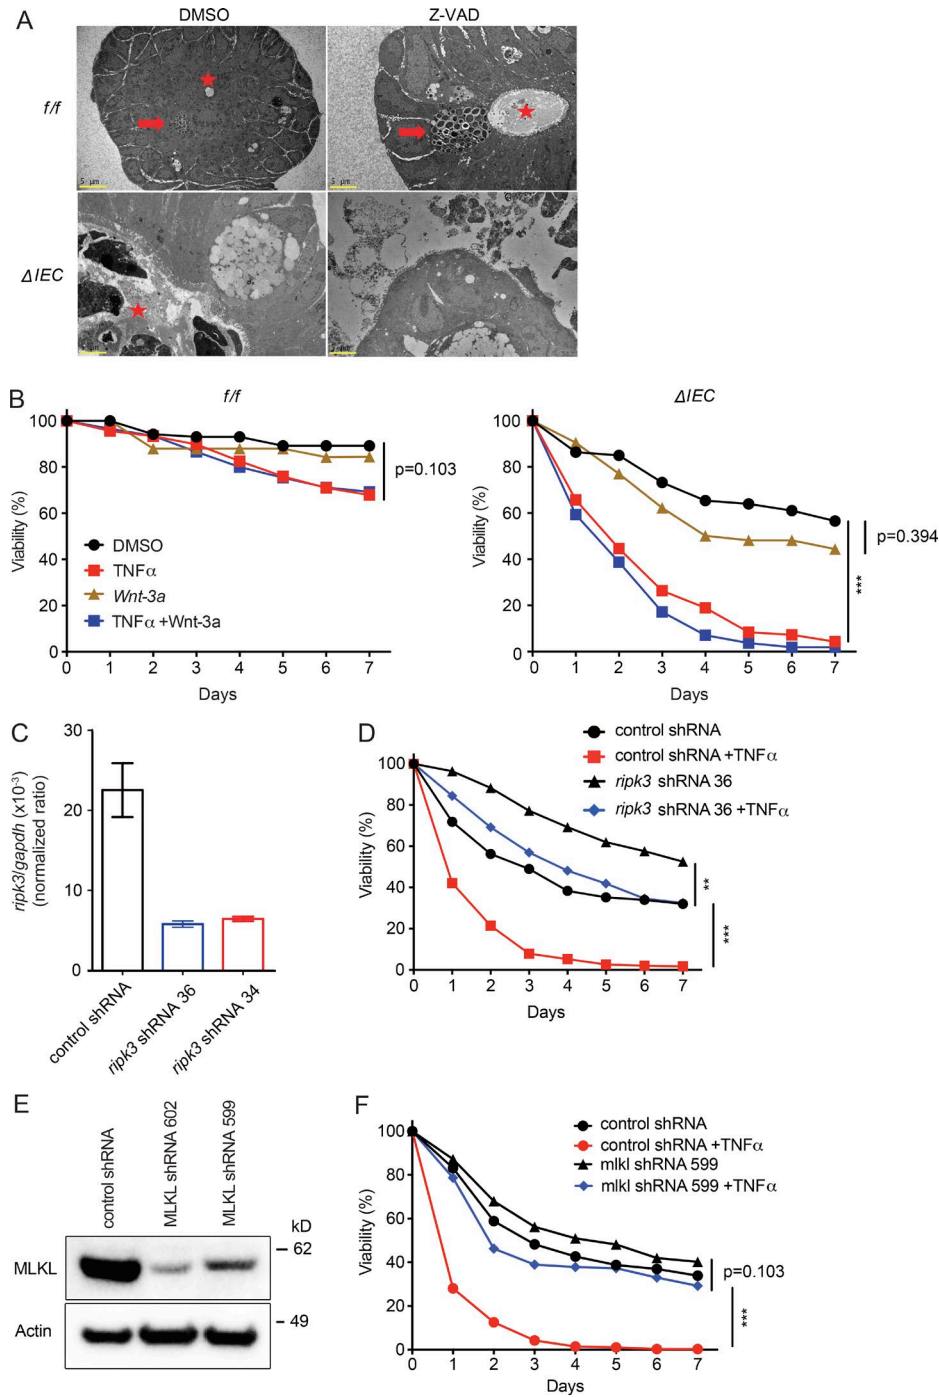

Figure S3. **Additional analyses of the effect of Z-VAD and TNF $\alpha$  on ATG16L1-deficient organoids.** (A) Representative lower magnification TEM images of organoids  $\pm$  Z-VAD-FMK to complement the TEM images from Fig. 5 E. Stars indicate organoid lumen, and arrows indicate Paneth cells. Bars, 5  $\mu$ m. *n* = 3 mice each. (B) Organoids from *Atg16L1<sup>f/f</sup>* (*f/f*) and *Atg16L1 $\Delta$ IEC* ( $\Delta$ IEC) mice were incubated with *Wnt-3a* to determine whether its presence interferes with the viability assay. Quantification of viable organoids  $\pm$  TNF $\alpha$  indicate that *Atg16L1 $\Delta$ IEC* organoids remain susceptible to TNF $\alpha$ -induced death. *n* = 3 mice each. (C) Quantitative RT-PCR measurement of *Ripk3* expression normalized to *Gapdh* in *Atg16L1 $\Delta$ IEC* organoids after transduction with lentiviruses encoding indicated shRNAs. *n* = 3 mice each. (D) The restoration of viability after *Ripk3* KD in *Atg16L1 $\Delta$ IEC* organoids (Fig. 5 H) was confirmed using a second shRNA targeting a different region of *Ripk3*. *n* = 3 mice each. (E) Representative Western blot image of MLKL and  $\beta$ -actin after transduction with lentiviruses encoding indicated shRNAs. (F) The restoration of viability after *Mlkl* KD in *Atg16L1 $\Delta$ IEC* organoids (Fig. 5 I) was confirmed using a second shRNA targeting a different region of *Mlkl*. Data points in B–D and F are mean of three technical replicates. Bars represent  $\pm$ SEM, and at least two independent experiments were performed. \*\*, *P* < 0.01; \*\*\*, *P* < 0.001 by unpaired *t* test.

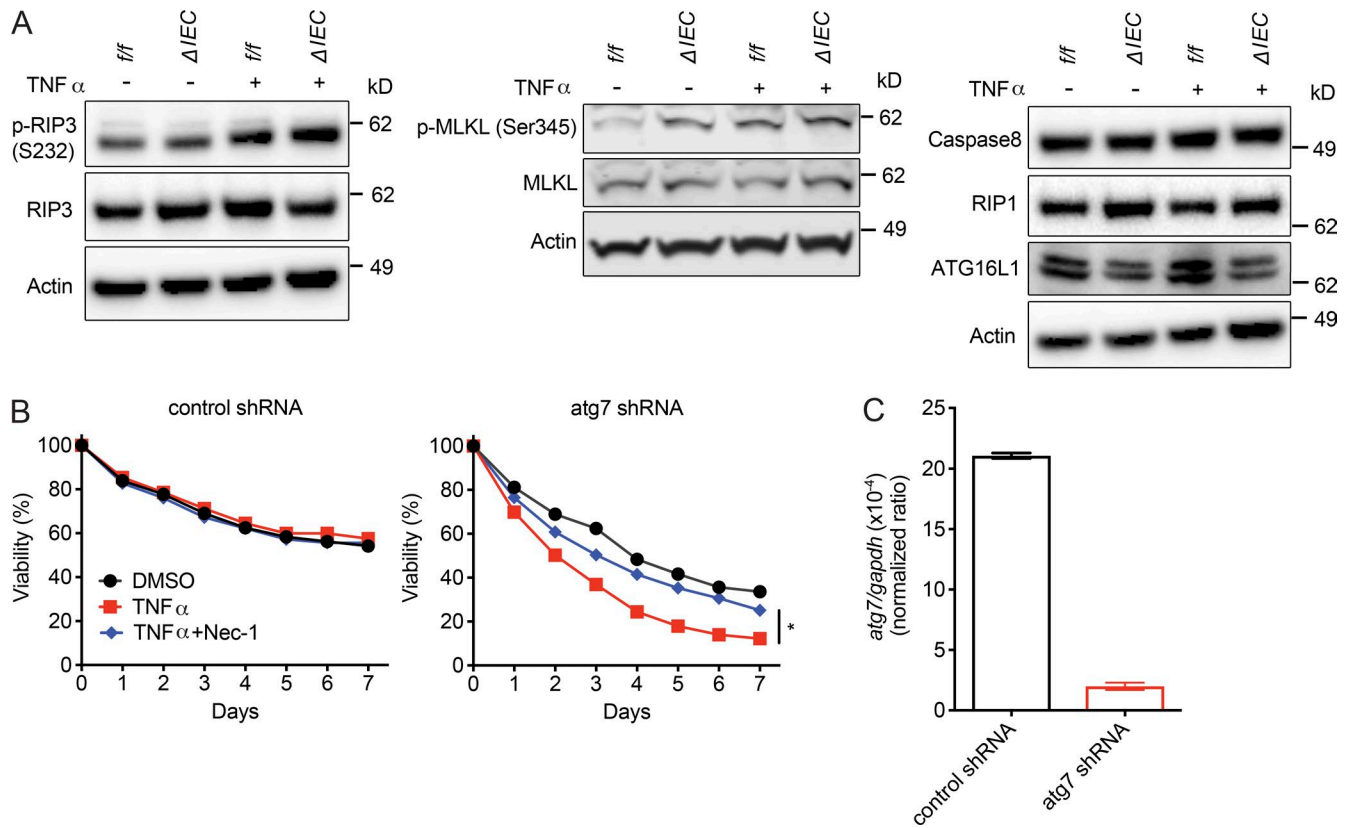

Figure S4. **ATG7-deficient organoids are susceptible to TNF $\alpha$ -induced death.** (A) Western blot analysis of necroptosis-related proteins in day 3 *Atg16L1<sup>f/f</sup>* and *Atg16L1<sup>ΔIEC</sup>* organoids treated with TNF $\alpha$  for 2 h. Blots are representative of at least two independent repeats. (B) Viability of lentivirus-infected organoids from B6 mice treated  $\pm$  TNF $\alpha$  and Nec-1. (C) Quantitative RT-PCR measurement of *Atg7* expression normalized to *Gapdh* in B6 organoids after transduction with lentiviruses encoding *Atg7* shRNA. Bars represent mean  $\pm$  SEM, and at least two independent experiments were performed. Data points are mean of three technical replicates. \*,  $P < 0.05$  by unpaired *t* test.

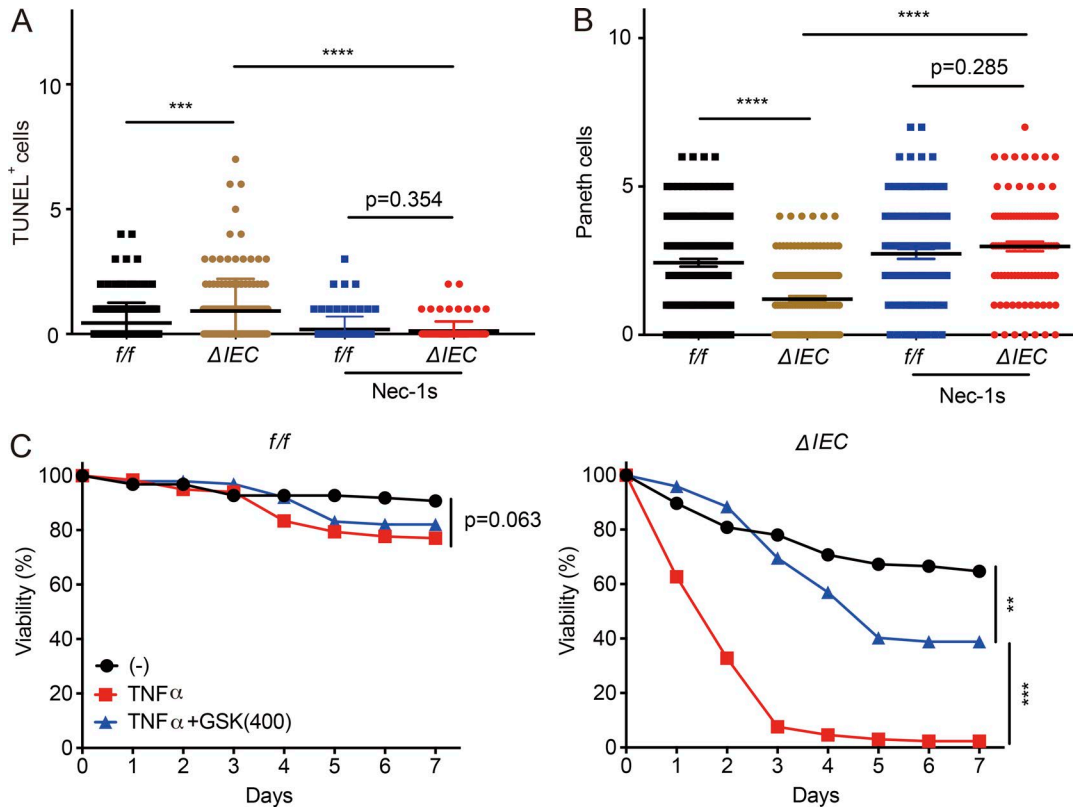

Figure S5. **Chemical inhibition of RIPK1 protects ATG16L1-deficient epithelial cells in vivo and in vitro.** (A and B) Number of TUNEL<sup>+</sup> (A) and Paneth (B) cells per crypt on day 15 in mice  $\pm$  daily injection of Nec-1s from day 9 to 14. At least 50 crypts were quantified from 3 mice per group. (C) Viability of organoids from *Atg16L1<sup>f/f</sup>* and *Atg16L1 $\Delta$ IEC* mice treated  $\pm$  TNF $\alpha$  and GSK547. Data points in A and B represent individual crypts, and data points in C are mean of three technical replicates. Bars represent mean  $\pm$  SEM, and at least two independent experiments were performed. \*\*, P < 0.01; \*\*\*, P < 0.001; \*\*\*\*, P < 0.0001 by one-way ANOVA and Tukey's test in A and B and unpaired *t* test in (C).

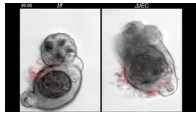

Video 1. **Live imaging analysis of TNF $\alpha$ -induced cell death in ATG16L1-deficient intestinal organoids.** Organoids from *Atg16L1<sup>f/f</sup>* and *Atg16L1 $\Delta$ IEC* mice on day 3 were treated with 20 ng/ml TNF $\alpha$  and stained with 100  $\mu$ g/ml PI before imaging. Time-lapse images of multiple fields were collected at 5-min intervals over 17 h. Digits represent hours:minutes. *Atg16L1 $\Delta$ IEC* organoids rapidly took up PI, underscoring the dramatic increase in sensitivity to cell death. At least two independent experiments were performed.
